# Supplementary material
Source: ML conference proceedings conference paper supplement (https://proceedings.neurips.cc/paper_files/paper/2021/hash/167434fa6219316417cd4160c0c5e7d2-Abstract.html)
Supplement: Supplementary file 1 [file 167434fa6219316417cd4160c0c5e7d2-Supplemental.zip]

Archive with 180 entries (145 files):
- supplementary-material/
- supplementary-material/supplementary_material.pdf
- supplementary-material/code/
- supplementary-material/code/.gitignore
- supplementary-material/code/condaenv.yml
- supplementary-material/code/README.md
- supplementary-material/code/experiment_toy2d/
- supplementary-material/code/experiment_toy2d/bump_periodic_flow.pt
- supplementary-material/code/experiment_toy2d/broken-2d-forces-periodic.ipynb
- supplementary-material/code/experiment_toy2d/broken-2d-forces-non-periodic.ipynb
- supplementary-material/code/experiment_toy2d/bump_nonperiodic_flow.pt
- supplementary-material/code/experiment_toy2d/potential2d-periodic.ipynb
- supplementary-material/code/experiment_toy2d/potential2d-non-periodic.ipynb
- supplementary-material/code/bgmol/
- supplementary-material/code/bgmol/MANIFEST.in
- supplementary-material/code/bgmol/setup.py
- supplementary-material/code/bgmol/bgmol/
- supplementary-material/code/bgmol/bgmol/__init__.py
- supplementary-material/code/bgmol/bgmol/systems/
- supplementary-material/code/bgmol/bgmol/systems/minipeptides.py
- supplementary-material/code/bgmol/bgmol/systems/__init__.py
- supplementary-material/code/bgmol/bgmol/systems/ala2.py
- supplementary-material/code/bgmol/bgmol/systems/base.py
- supplementary-material/code/bgmol/bgmol/datasets/
- supplementary-material/code/bgmol/bgmol/datasets/minipeptides.py
- supplementary-material/code/bgmol/bgmol/datasets/__init__.py
- supplementary-material/code/bgmol/bgmol/datasets/base.py
- supplementary-material/code/bgmol/bgmol/tpl/
- supplementary-material/code/bgmol/bgmol/tpl/__init__.py
- supplementary-material/code/bgmol/bgmol/tpl/hdf5.py
- supplementary-material/code/bgmol/bgmol/util/
- supplementary-material/code/bgmol/bgmol/util/pkg.py
- supplementary-material/code/bgmol/bgmol/util/__init__.py
- supplementary-material/code/bgmol/bgmol/util/exceptions.py
- supplementary-material/code/bgmol/bgmol/util/yml.py
- supplementary-material/code/bgmol/bgmol/data/
- supplementary-material/code/bgmol/bgmol/data/A.pdb
- supplementary-material/code/bgmol/bgmol/data/README.md
- supplementary-material/code/bgforces/
- supplementary-material/code/bgforces/setup.py
- supplementary-material/code/bgforces/bgforces/
- supplementary-material/code/bgforces/bgforces/__init__.py
- supplementary-material/code/bgforces/bgforces/ala2/
- supplementary-material/code/bgforces/bgforces/ala2/zmatrix.py
- supplementary-material/code/bgforces/bgforces/ala2/__init__.py
- supplementary-material/code/bgforces/bgforces/ala2/data.py
- supplementary-material/code/bgforces/bgforces/ala2/model.py
- supplementary-material/code/bgforces/bgforces/ala2/plot.py
- supplementary-material/code/bgforces/bgforces/util/
- supplementary-material/code/bgforces/bgforces/util/simulation.py
- supplementary-material/code/bgforces/bgforces/util/__init__.py
- supplementary-material/code/bgflow/
- supplementary-material/code/bgflow/setup.py
- supplementary-material/code/bgflow/bgflow/
- supplementary-material/code/bgflow/bgflow/__init__.py
- supplementary-material/code/bgflow/bgflow/bg.py
- supplementary-material/code/bgflow/bgflow/nn/
- supplementary-material/code/bgflow/bgflow/nn/__init__.py
- supplementary-material/code/bgflow/bgflow/nn/dense.py
- supplementary-material/code/bgflow/bgflow/nn/training/
- supplementary-material/code/bgflow/bgflow/nn/training/__init__.py
- supplementary-material/code/bgflow/bgflow/nn/training/trainers.py
- supplementary-material/code/bgflow/bgflow/nn/flow/
- supplementary-material/code/bgflow/bgflow/nn/flow/orthogonal.py
- supplementary-material/code/bgflow/bgflow/nn/flow/inverted.py
- supplementary-material/code/bgflow/bgflow/nn/flow/triangular.py
- supplementary-material/code/bgflow/bgflow/nn/flow/circular.py
- supplementary-material/code/bgflow/bgflow/nn/flow/coupling.py
- supplementary-material/code/bgflow/bgflow/nn/flow/diffeq.py
- supplementary-material/code/bgflow/bgflow/nn/flow/kronecker.py
- supplementary-material/code/bgflow/bgflow/nn/flow/affine.py
- supplementary-material/code/bgflow/bgflow/nn/flow/checkerboard.py
- supplementary-material/code/bgflow/bgflow/nn/flow/sequential.py
- supplementary-material/code/bgflow/bgflow/nn/flow/elementwise.py
- supplementary-material/code/bgflow/bgflow/nn/flow/bnaf.py
- supplementary-material/code/bgflow/bgflow/nn/flow/spline.py
- supplementary-material/code/bgflow/bgflow/nn/flow/__init__.py
- supplementary-material/code/bgflow/bgflow/nn/flow/pppp.py
- supplementary-material/code/bgflow/bgflow/nn/flow/funnel.py
- supplementary-material/code/bgflow/bgflow/nn/flow/cdf.py
- supplementary-material/code/bgflow/bgflow/nn/flow/base.py
- supplementary-material/code/bgflow/bgflow/nn/flow/dynamics/
- supplementary-material/code/bgflow/bgflow/nn/flow/dynamics/density.py
- supplementary-material/code/bgflow/bgflow/nn/flow/dynamics/inversed.py
- supplementary-material/code/bgflow/bgflow/nn/flow/dynamics/blackbox.py
- supplementary-material/code/bgflow/bgflow/nn/flow/dynamics/simple.py
- supplementary-material/code/bgflow/bgflow/nn/flow/dynamics/__init__.py
- supplementary-material/code/bgflow/bgflow/nn/flow/dynamics/kernel_dynamic.py
- supplementary-material/code/bgflow/bgflow/nn/flow/dynamics/anode_dynamic.py
- supplementary-material/code/bgflow/bgflow/nn/flow/estimator/
- supplementary-material/code/bgflow/bgflow/nn/flow/estimator/hutchinson_estimator.py
- supplementary-material/code/bgflow/bgflow/nn/flow/estimator/brute_force_estimator.py
- supplementary-material/code/bgflow/bgflow/nn/flow/estimator/__init__.py
- supplementary-material/code/bgflow/bgflow/nn/flow/root_finding/
- supplementary-material/code/bgflow/bgflow/nn/flow/root_finding/approx_inverse.py
- supplementary-material/code/bgflow/bgflow/nn/flow/root_finding/bisection.py
- supplementary-material/code/bgflow/bgflow/nn/flow/root_finding/__init__.py
- supplementary-material/code/bgflow/bgflow/nn/flow/root_finding/newton.py
- supplementary-material/code/bgflow/bgflow/nn/flow/crd_transform/
- supplementary-material/code/bgflow/bgflow/nn/flow/crd_transform/_deprecated_ic.py
- supplementary-material/code/bgflow/bgflow/nn/flow/crd_transform/__init__.py
- supplementary-material/code/bgflow/bgflow/nn/flow/crd_transform/ic_helper.py
- supplementary-material/code/bgflow/bgflow/nn/flow/crd_transform/ic.py
- supplementary-material/code/bgflow/bgflow/nn/flow/crd_transform/pca.py
- supplementary-material/code/bgflow/bgflow/nn/flow/stochastic/
- supplementary-material/code/bgflow/bgflow/nn/flow/stochastic/__init__.py
- supplementary-material/code/bgflow/bgflow/nn/flow/stochastic/mcmc.py
- supplementary-material/code/bgflow/bgflow/nn/flow/stochastic/augment.py
- supplementary-material/code/bgflow/bgflow/nn/flow/stochastic/langevin.py
- supplementary-material/code/bgflow/bgflow/nn/flow/stochastic/snf_openmm.py
- supplementary-material/code/bgflow/bgflow/nn/flow/transformer/
- supplementary-material/code/bgflow/bgflow/nn/flow/transformer/entropy_scaling.py
- supplementary-material/code/bgflow/bgflow/nn/flow/transformer/base.py
- supplementary-material/code/bgflow/bgflow/nn/flow/transformer/spline.py
- supplementary-material/code/bgflow/bgflow/nn/flow/transformer/affine.py
- supplementary-material/code/bgflow/bgflow/nn/flow/transformer/sigmoid.py
- supplementary-material/code/bgflow/bgflow/nn/flow/transformer/__init__.py
- supplementary-material/code/bgflow/bgflow/nn/flow/transformer/compact/
- supplementary-material/code/bgflow/bgflow/nn/flow/transformer/compact/__init__.py
- supplementary-material/code/bgflow/bgflow/nn/flow/transformer/compact/moebius.py
- supplementary-material/code/bgflow/bgflow/nn/flow/transformer/compact/compact.py
- supplementary-material/code/bgflow/bgflow/utils/
- supplementary-material/code/bgflow/bgflow/utils/rbf_kernels.py
- supplementary-material/code/bgflow/bgflow/utils/train.py
- supplementary-material/code/bgflow/bgflow/utils/autograd.py
- supplementary-material/code/bgflow/bgflow/utils/types.py
- supplementary-material/code/bgflow/bgflow/utils/geometry.py
- supplementary-material/code/bgflow/bgflow/utils/openmm.py
- supplementary-material/code/bgflow/bgflow/utils/tensorops.py
- supplementary-material/code/bgflow/bgflow/utils/internal_coordinates.py
- supplementary-material/code/bgflow/bgflow/utils/shape.py
- supplementary-material/code/bgflow/bgflow/utils/__init__.py
- supplementary-material/code/bgflow/bgflow/utils/plot/
- supplementary-material/code/bgflow/bgflow/utils/plot/__init__.py
- supplementary-material/code/bgflow/bgflow/utils/plot/ala2.py
- supplementary-material/code/bgflow/bgflow/distribution/
- supplementary-material/code/bgflow/bgflow/distribution/mixture.py
- supplementary-material/code/bgflow/bgflow/distribution/modulify.py
- supplementary-material/code/bgflow/bgflow/distribution/__init__.py
- supplementary-material/code/bgflow/bgflow/distribution/normal.py
- supplementary-material/code/bgflow/bgflow/distribution/product.py
- supplementary-material/code/bgflow/bgflow/distribution/distribution.py
- supplementary-material/code/bgflow/bgflow/distribution/energy/
- supplementary-material/code/bgflow/bgflow/distribution/energy/particles.py
- supplementary-material/code/bgflow/bgflow/distribution/energy/lennard_jones.py
- supplementary-material/code/bgflow/bgflow/distribution/energy/__init__.py
- supplementary-material/code/bgflow/bgflow/distribution/energy/openmm.py
- supplementary-material/code/bgflow/bgflow/distribution/energy/double_well.py
- supplementary-material/code/bgflow/bgflow/distribution/energy/base.py
- supplementary-material/code/bgflow/bgflow/distribution/sampling/
- supplementary-material/code/bgflow/bgflow/distribution/sampling/__init__.py
- supplementary-material/code/bgflow/bgflow/distribution/sampling/mcmc.py
- supplementary-material/code/bgflow/bgflow/distribution/sampling/base.py
- supplementary-material/code/bgflow/bgflow/distribution/sampling/dataset.py
- supplementary-material/code/bgflow/bgflow/distribution/sampling/_mcmc/
- supplementary-material/code/bgflow/bgflow/distribution/sampling/_mcmc/umbrella_sampling.py
- supplementary-material/code/bgflow/bgflow/distribution/sampling/_mcmc/metropolis.py
- supplementary-material/code/bgflow/bgflow/distribution/sampling/_mcmc/permutation.py
- supplementary-material/code/bgflow/bgflow/distribution/sampling/_mcmc/__init__.py
- supplementary-material/code/bgflow/bgflow/distribution/sampling/_mcmc/analysis.py
- supplementary-material/code/bgflow/bgflow/distribution/sampling/_mcmc/latent_sampling.py
- supplementary-material/code/bgflow/bgflow/factory/
- supplementary-material/code/bgflow/bgflow/factory/energy.py
- supplementary-material/code/bgflow/bgflow/factory/generator_builder.py
- supplementary-material/code/bgflow/bgflow/factory/distribution_factory.py
- supplementary-material/code/bgflow/bgflow/factory/tensor_info.py
- supplementary-material/code/bgflow/bgflow/factory/icmarginals.py
- supplementary-material/code/bgflow/bgflow/factory/transformer_factory.py
- supplementary-material/code/bgflow/bgflow/factory/__init__.py
- supplementary-material/code/bgflow/bgflow/factory/wrap.py
- supplementary-material/code/bgflow/bgflow/factory/conditioner_factory.py
- supplementary-material/code/experiment_runtime/
- supplementary-material/code/experiment_runtime/submit.py
- supplementary-material/code/experiment_runtime/timings.py
- supplementary-material/code/experiment_ala2/
- supplementary-material/code/experiment_ala2/example_checkpoint.ckpt
- supplementary-material/code/experiment_ala2/train.py
- supplementary-material/code/experiment_ala2/plot_ala2_model.ipynb
- supplementary-material/code/experiment_ala2/simulate.ipynb
- supplementary-material/code/experiment_ala2/plot_md_energies.ipynb
