# Supplementary material
Source: ML conference proceedings conference paper supplement (https://proceedings.neurips.cc/paper_files/paper/2021/hash/167434fa6219316417cd4160c0c5e7d2-Abstract.html)
Supplement: Supplementary file 1 [file 167434fa6219316417cd4160c0c5e7d2-Supplemental.zip › supplementary-material/code/bgflow/bgflow/bg.py]

import torch

from .distribution.energy import Energy
from .distribution.sampling import Sampler


def unnormalized_kl_div(prior, flow, target, n_samples, temperature=1.0):
    z = prior.sample(n_samples, temperature=temperature)
    if isinstance(z, torch.Tensor):
        z = (z,)
    *x, dlogp = flow(*z, temperature=temperature)
    return target.energy(*x, temperature=temperature) - dlogp


def unormalized_nll(prior, flow, *x, temperature=1.0):
    *z, dlogp = flow(*x, inverse=True, temperature=temperature)
    return prior.energy(*z, temperature=temperature) - dlogp


def log_weights(*x, prior, flow, target, temperature=1.0):
    *z, dlogp = flow(*x, inverse=True, temperature=temperature)
    return log_weights_given_latent(
        x, z, dlogp, prior, flow, target, temperature=temperature
    )


def log_weights_given_latent(x, z, dlogp, prior, flow, target, temperature=1.0):
    if isinstance(x, torch.Tensor):
        x = (x,)
    if isinstance(z, torch.Tensor):
        z = (z,)
    logw = (
        prior.energy(*z, temperature=temperature)
        + dlogp
        - target.energy(*x, temperature=temperature)
    )
    logw = logw - logw.max()
    logw = logw - torch.logsumexp(logw, dim=0)
    return logw.view(-1)


class BoltzmannGenerator(Energy, Sampler):
    def __init__(self, prior, flow, target):
        """ Constructs Boltzmann Generator, i.e. normalizing flow to sample target density

        Parameters
        ----------
        prior : object
            Prior distribution implementing the energy() and sample() functions
        flow : Flow object
            Flow that can be evaluated forward and reverse
        target : object
            Target distribution implementing the energy() function
        """
        super().__init__(
            target.event_shapes if target is not None else prior.event_shapes
        )
        self._prior = prior
        self._flow = flow
        self._target = target

    @property
    def flow(self):
        return self._flow

    @property
    def prior(self):
        return self._prior

    def sample(
        self,
        n_samples,
        temperature=1.0,
        with_latent=False,
        with_dlogp=False,
        with_energy=False,
        with_log_weights=False,
        with_weights=False,
    ):
        z = self._prior.sample(n_samples, temperature=temperature)
        if isinstance(z, torch.Tensor):
            z = (z,)
        *results, dlogp = self._flow(*z, temperature=temperature)
        results = list(results)

        if with_latent:
            results.append(*z)
        if with_dlogp:
            results.append(dlogp)
        if with_energy:
            energy = self._prior.energy(*z, temperature=temperature) + dlogp
            results.append(energy)
        if with_log_weights or with_weights:
            target_energy = self._target.energy(*results, temperature=temperature)
            bg_energy = self._prior.energy(*z, temperature=temperature) + dlogp
            log_weights = bg_energy - target_energy
            if with_log_weights:
                results.append(log_weights)
            weights = torch.softmax(log_weights, dim=0).view(-1)
            if with_weights:
                results.append(weights)
        if len(results) > 1:
            return (*results,)
        else:
            return results[0]

    def energy(self, *x, temperature=1.0):
        return unormalized_nll(self._prior, self._flow, *x, temperature=temperature)

    def kldiv(self, n_samples, temperature=1.0):
        return unnormalized_kl_div(
            self._prior, self._flow, self._target, n_samples, temperature=temperature
        )

    def log_weights(self, *x, temperature=1.0):
        return log_weights(
            *x,
            prior=self._prior,
            flow=self._flow,
            target=self._target,
            temperature=temperature
        )

    def log_weights_given_latent(self, x, z, dlogp, temperature=1.0):
        return log_weights_given_latent(
            x, z, dlogp, self._prior, self._flow, self._target, temperature=temperature
        )

    def trigger(self, function_name):
        return self.flow.trigger(function_name)
