# Supplementary material
Source: ML conference proceedings conference paper supplement (https://proceedings.neurips.cc/paper_files/paper/2021/hash/167434fa6219316417cd4160c0c5e7d2-Abstract.html)
Supplement: Supplementary file 1 [file 167434fa6219316417cd4160c0c5e7d2-Supplemental.zip › supplementary-material/code/bgflow/bgflow/distribution/energy/base.py]

from typing import Union, Optional, Sequence
from collections.abc import Sequence as _Sequence
import warnings

import torch

__all__ = ["Energy"]


def _is_non_empty_sequence_of_integers(x):
    return (
        isinstance(x, _Sequence) and (len(x) > 0) and all(isinstance(y, int) for y in x)
    )


def _is_sequence_of_non_empty_sequences_of_integers(x):
    return (
        isinstance(x, _Sequence)
        and len(x) > 0
        and all(_is_non_empty_sequence_of_integers(y) for y in x)
    )


def _parse_dim(dim):
    if isinstance(dim, int):
        return [torch.Size([dim])]
    if _is_non_empty_sequence_of_integers(dim):
        return [torch.Size(dim)]
    elif _is_sequence_of_non_empty_sequences_of_integers(dim):
        return list(map(torch.Size, dim))
    else:
        raise ValueError(
            f"dim must be either:"
            f"\n\t- an integer"
            f"\n\t- a non-empty list of integers"
            f"\n\t- a list with len > 1 containing non-empty lists containing integers"
        )


class Energy(torch.nn.Module):
    def __init__(self, dim: Union[int, Sequence[int], Sequence[Sequence[int]]], **kwargs):
        """
        Base class for all energy models.

        It supports energies defined over:
            - simple vector states of shape [..., D]
            - tensor states of shape [..., D1, D2, ..., Dn]
            - states composed of multiple tensors (x1, x2, x3, ...)
              where each xi is of form [..., D1, D2, ...., Dn]

        Each input can have multiple batch dimensions,
        so a final state could have shape
            ([B1, B2, ..., Bn, D1, D2, ..., Dn],
             ...,
             [B1, B2, ..., Bn, D'1, ..., D'1n]).

        which would return an energy tensor with shape
            ([B1, B2, ..., Bn, 1]).

        Forces are computed for each input by default.
        Here the convention is followed, that forces will have
        the same shape as the input state.

        To define the state shape, the parameter `dim` has to
        be of the following form:
            - an integer, e.g. d = 5
                then each event is a simple vector state
                of shape [..., 5]
            - a non-empty list of integers, e.g. d = [3, 6, 7]
                then each event is a tensor state of shape [..., 3, 6, 7]
            - a list of len > 1 containing non-empty integer lists,
                e.g. d = [[1, 3], [5, 3, 6]]. Then each event is
                a tuple of tensors of shape ([..., 1, 3], [..., 5, 3, 6])

        Parameters:
        ----------
        dim: Union[int, Sequence[int], Sequence[Sequence[int]]]
            The event shape of the states for which energies/forces ar computed.

        """
        super().__init__(**kwargs)
        self._event_shapes = _parse_dim(dim)

    @property
    def dim(self):
        if len(self._event_shapes) > 1:
            raise ValueError(
                "This energy instance is defined for multiple events."
                "Therefore there exists no coherent way to define the dimension of an event."
                "Consider using Energy.event_shapes instead."
            )
        elif len(self._event_shapes[0]) > 1:
            warnings.warn(
                "This Energy instance is defined on multidimensional events. "
                "Therefore, its Energy.dim is distributed over multiple tensor dimensions. "
                "Consider using Energy.event_shape instead.",
                UserWarning,
            )
        return int(torch.prod(torch.tensor(self.event_shape, dtype=int)))

    @property
    def event_shape(self):
        if len(self._event_shapes) > 1:
            raise ValueError(
                "This energy instance is defined for multiple events."
                "Therefore therefore there exists no single event shape."
                "Consider using Energy.event_shapes instead."
            )
        return self._event_shapes[0]

    @property
    def event_shapes(self):
        return self._event_shapes

    def _energy(self, *xs, **kwargs):
        raise NotImplementedError()

    def energy(self, *xs, temperature=1.0, **kwargs):
        assert len(xs) == len(
            self._event_shapes
        ), f"Expected {len(self._event_shapes)} arguments but only received {len(xs)}"
        batch_shape = xs[0].shape[: -len(self._event_shapes[0])]
        for i, (x, s) in enumerate(zip(xs, self._event_shapes)):
            assert x.shape[: -len(s)] == batch_shape, (
                f"Inconsistent batch shapes."
                f"Input at index {i} has batch shape {x.shape[:-len(s)]}"
                f"however input at index 0 has batch shape {batch_shape}."
            )
            assert (
                x.shape[-len(s) :] == s
            ), f"Input at index {i} as wrong shape {x.shape[-len(s):]} instead of {s}"
        return self._energy(*xs, **kwargs) / temperature

    def force(
        self,
        *xs: Sequence[torch.Tensor],
        temperature: float = 1.0,
        ignore_indices: Optional[Sequence[int]] = None,
        no_grad: Union[bool, Sequence[int]] = False,
        **kwargs,
    ):
        """
        Computes forces with respect to the input tensors.

        If states are tuples of tensors, it returns a tuple of forces for each input tensor.
        If states are simple tensors / vectors it returns a single forces.

        Depending on the context it might be unnecessary to compute all input forces.
        For this case `ignore_indices` denotes those input tensors for which no forces.
        are to be computed.

        E.g. by setting `ignore_indices = [1]` the result of `energy.force(x, y, z)`
        will be `(fx, None, fz)`.

        Furthermore, the forces will allow for taking high-order gradients by default.
        If this is unwanted, e.g. to save memory it can be turned off by setting `no_grad=True`.
        If higher-order gradients should be ignored for only a subset of inputs it can
        be specified by passing a list of ignore indices to `no_grad`.

        E.g. by setting `no_grad = [1]` the result of `energy.force(x, y, z)`
        will be `(fx, fy, fz)`, where `fx` and `fz` allow for taking higher order gradients
        and `fy` will not.

        Parameters:
        -----------
        xs: *torch.Tensor
            Input tensor(s)
        temperature: float
            Temperature at which to compute forces
        ignore_indices: Sequence[int]
            Which inputs should be skipped in the force computation
        no_grad: Union[bool, Sequence[int]]
            Either specifies whether higher-order gradients should be computed at all,
            or specifies which inputs to leave out when computing higher-order gradients.
        """
        if ignore_indices is None:
            ignore_indices = []

        with torch.enable_grad():
            forces = []
            requires_grad_states = [x.requires_grad for x in xs]

            for i, x in enumerate(xs):
                if i not in ignore_indices:
                    x = x.requires_grad_(True)
                else:
                    x = x.requires_grad_(False)

            energy = self.energy(*xs, temperature=temperature, **kwargs)

            for i, x in enumerate(xs):
                if i not in ignore_indices:
                    if isinstance(no_grad, bool):
                        with_grad = not no_grad
                    else:
                        with_grad = i not in no_grad
                    force = -torch.autograd.grad(
                        energy.sum(), x, create_graph=with_grad,
                    )[0]
                    forces.append(force)
                    x.requires_grad_(requires_grad_states[i])
                else:
                    forces.append(None)

        forces = (*forces,)
        if len(self._event_shapes) == 1:
            forces = forces[0]
        return forces
