# Supplementary material
Source: ML conference proceedings conference paper supplement (https://proceedings.neurips.cc/paper_files/paper/2021/hash/167434fa6219316417cd4160c0c5e7d2-Abstract.html)
Supplement: Supplementary file 1 [file 167434fa6219316417cd4160c0c5e7d2-Supplemental.zip › supplementary-material/code/bgflow/bgflow/distribution/energy/double_well.py]

import torch

from .base import Energy


__all__ = ["DoubleWellEnergy", "MultiDimensionalDoubleWell"]


class DoubleWellEnergy(Energy):
    def __init__(self, dim, a=0, b=-4.0, c=1.0):
        super().__init__(dim)
        self._a = a
        self._b = b
        self._c = c

    def _energy(self, x):
        d = x[:, [0]]
        v = x[:, 1:]
        e1 = self._a * d + self._b * d.pow(2) + self._c * d.pow(4)
        e2 = 0.5 * v.pow(2).sum(dim=-1, keepdim=True)
        return e1 + e2


class MultiDimensionalDoubleWell(Energy):
    def __init__(self, dim, a=0.0, b=-4.0, c=1.0, transformer=None):
        super().__init__(dim)
        if not isinstance(a, torch.Tensor):
            a = torch.tensor(a)
        if not isinstance(b, torch.Tensor):
            b = torch.tensor(b)
        if not isinstance(c, torch.Tensor):
            c = torch.tensor(c)
        self.register_buffer("_a", a)
        self.register_buffer("_b", b)
        self.register_buffer("_c", c)
        if transformer is not None:
            self.register_buffer("_transformer", transformer)
        else:
            self._transformer = None

    def _energy(self, x):
        if self._transformer is not None:
            x = torch.matmul(x, self._transformer)
        e1 = self._a * x + self._b * x.pow(2) + self._c * x.pow(4)
        return e1.sum(dim=1, keepdim=True)
