# Supplementary material
Source: ML conference proceedings conference paper supplement (https://proceedings.neurips.cc/paper_files/paper/2021/hash/167434fa6219316417cd4160c0c5e7d2-Abstract.html)
Supplement: Supplementary file 1 [file 167434fa6219316417cd4160c0c5e7d2-Supplemental.zip › supplementary-material/code/bgflow/bgflow/distribution/sampling/_mcmc/__init__.py]

__author__ = "noe"

from .analysis import *
from .latent_sampling import *
from .metropolis import *
from .permutation import *
from .umbrella_sampling import *
