# Supplementary material
Source: ML conference proceedings conference paper supplement (https://proceedings.neurips.cc/paper_files/paper/2021/hash/167434fa6219316417cd4160c0c5e7d2-Abstract.html)
Supplement: Supplementary file 1 [file 167434fa6219316417cd4160c0c5e7d2-Supplemental.zip › supplementary-material/code/bgflow/bgflow/distribution/sampling/base.py]

import torch


__all__ = ["Sampler"]


class Sampler(torch.nn.Module):
    
    def __init__(self, **kwargs):
        super().__init__(**kwargs)
    
    def _sample_with_temperature(self, n_samples, temperature, *args, **kwargs):
        raise NotImplementedError()
        
    def _sample(self, n_samples, *args, **kwargs):
        raise NotImplementedError()
    
    def sample(self, n_samples, temperature=1.0, *args, **kwargs):
        if temperature != 1.0:
            return self._sample_with_temperature(n_samples, temperature, *args, **kwargs)
        else:
            return self._sample(n_samples, *args, **kwargs)
