# Supplementary material
Source: ML conference proceedings conference paper supplement (https://proceedings.neurips.cc/paper_files/paper/2021/hash/167434fa6219316417cd4160c0c5e7d2-Abstract.html)
Supplement: Supplementary file 1 [file 167434fa6219316417cd4160c0c5e7d2-Supplemental.zip › supplementary-material/code/bgflow/bgflow/factory/__init__.py]

from .energy import *
from .wrap import *
from .tensor_info import *
from .icmarginals import *
from .conditioner_factory import *
from .distribution_factory import *
from .transformer_factory import *
from .generator_builder import *
