# Supplementary material
Source: ML conference proceedings conference paper supplement (https://proceedings.neurips.cc/paper_files/paper/2021/hash/167434fa6219316417cd4160c0c5e7d2-Abstract.html)
Supplement: Supplementary file 1 [file 167434fa6219316417cd4160c0c5e7d2-Supplemental.zip › supplementary-material/code/bgflow/bgflow/factory/generator_builder.py]

import warnings
import copy

import numpy as np
import torch
import bgflow as bg
from .wrap import SetConstantFlow
from .tensor_info import (
    ShapeInfo, TensorInfo, BONDS, ANGLES, TORSIONS, FIXED, ORIGIN, ROTATION, AUGMENTED, TARGET
)
from .conditioner_factory import make_conditioners
from .transformer_factory import make_transformer
from .distribution_factory import make_distribution
from .icmarginals import InternalCoordinateMarginals

__all__ = ["BoltzmannGeneratorBuilder"]


def _tuple(thing):
    if isinstance(thing, tuple) and not hasattr(thing, "_fields"):  # exclude namedtuples
        return thing
    elif isinstance(thing, list):
        return tuple(thing)
    else:
        return thing,


class BoltzmannGeneratorBuilder:
    """
    Parameters
    ----------
    prior_dims : ShapeInfo
        The tensor dimensions sampled by the prior.

    """
    # for global coordinate add_transform
    _DEFAULT_ORIGIN_INDEX = 3
    _DEFAULT_ROTATION_INDEX = 4

    def __init__(self, prior_dims, target=None, device=None, dtype=None):
        self.DEFAULT_TRANSFORMER_TYPE = bg.ConditionalSplineTransformer
        self.DEFAULT_TRANSFORMER_KWARGS = dict()
        self.DEFAULT_CONDITIONER_KWARGS = dict()
        self.DEFAULT_PRIOR_TYPE = bg.UniformDistribution
        self.DEFAULT_PRIOR_KWARGS = dict()

        self.ctx = {"device": device, "dtype": dtype}
        self.prior_dims = prior_dims
        self.current_dims = self.prior_dims.copy()
        self.layers = []
        self.constants = []
        # transformer and prior factories  (use defaults everwhere)
        self.transformer_type = dict()
        self.transformer_kwargs = dict()
        self.prior_type = dict()
        self.prior_kwargs = dict()
        self._constrained_bonds = dict()
        # default targets
        self.targets = dict()
        if target is not None:
            self.targets[TARGET] = target
        if AUGMENTED in self.prior_dims:
            dim = self.prior_dims[AUGMENTED]
            self.targets[AUGMENTED] = bg.NormalDistribution(dim, torch.zeros(dim, **self.ctx))

    def build_generator(self, zero_parameters=False):
        generator = bg.BoltzmannGenerator(
            prior=self.build_prior(),
            flow=self.build_flow(zero_parameters=zero_parameters),
            target=self.build_target()
        )
        self.clear()
        return generator

    def build_flow(self, zero_parameters=False):
        flow = bg.SequentialFlow(self.layers)
        if zero_parameters:
            for p in flow.parameters():
                p.data.zero_()
        return flow

    def build_prior(self):
        priors = []
        for field in self.prior_dims:
            if field in self.constants:
                continue
            prior_type = self.prior_type.get(field, self.DEFAULT_PRIOR_TYPE)
            prior_kwargs = self.prior_kwargs.get(field, self.DEFAULT_PRIOR_KWARGS)
            prior = make_distribution(
                distribution_type=prior_type,
                shape=self.prior_dims[field],
                **self.ctx,
                **prior_kwargs
            )
            priors.append(prior)
        if len(priors) > 1:
            return bg.ProductDistribution(priors)
        else:
            return priors[0]

    def build_target(self):
        targets = []
        for field in self.current_dims:
            if field in self.targets:
                targets.append(self.targets[field])
            else:
                warnings.warn(f"No target energy for {field}.", UserWarning)

        if len(targets) > 1:
            return bg.ProductEnergy(targets)
        elif len(targets) == 1:
            return targets[0]
        else:
            return None

    def clear(self):
        self.layers = []
        self.current_dims = self.prior_dims.copy()

    def add_condition(self, what, on=tuple(), **kwargs):
        """

        Parameters
        ----------
        what
        on
        **kwargs

        Notes
        -----
        Always take transformer of what[0].

        Returns
        -------

        """
        on = _tuple(on)
        if len(on) == 0:
            raise ValueError("Need to condition on something.")
        what = _tuple(what)
        if len(what) == 0:
            raise ValueError("Need to transform something.")

        transformer_types = [self.transformer_type.get(el, self.DEFAULT_TRANSFORMER_TYPE) for el in what]
        transformer_type = transformer_types[0]
        if not all(ttype == transformer_type for ttype in transformer_types):
            raise ValueError("Fields with different transformer_type cannot be transformed together.")
        transformer_kwargss = [self.transformer_kwargs.get(el, self.DEFAULT_TRANSFORMER_KWARGS) for el in what]
        transformer_kwargs = transformer_kwargss[0]
        if not all(tkwargs == transformer_kwargs for tkwargs in transformer_kwargss):
            raise ValueError("Fields with different transformer_kwargs cannot be transformed together.")

        conditioner_kwargs = copy.copy(self.DEFAULT_CONDITIONER_KWARGS)
        conditioner_kwargs.update(kwargs)
        conditioners = make_conditioners(
            transformer_type=transformer_type,
            transformer_kwargs=transformer_kwargs,
            what=what,
            on=on,
            shape_info=self.current_dims,
            **conditioner_kwargs
        )
        transformer = make_transformer(
            transformer_type=transformer_type,
            what=what,
            shape_info=self.current_dims,
            conditioners=conditioners,
            **transformer_kwargs
        )
        coupling = bg.CouplingFlow(
            transformer=transformer,
            transformed_indices=[self.current_dims.index(f) for f in what],
            cond_indices=[self.current_dims.index(f) for f in on]
        ).to(**self.ctx)
        self.layers.append(coupling)

    def add_set_constant(self, what, tensor):
        if what in self.current_dims:
            if what in self.prior_dims:
                self.constants.append(what)
            else:
                if self.current_dims[what] != tuple(tensor.shape):
                    raise ValueError(f"Constant tensor {tensor} must have shape {self.current_dims[what]}")
        else:
            if what in self.prior_dims:
                raise ValueError(f"Cannot set {what} constant; field was already deleted or replaced.")
            else:
                self.current_dims[what] = tuple(tensor.shape)
        fix_flow = SetConstantFlow(
            indices=[self.current_dims.index(what)],
            values=[tensor]
        )
        self.layers.append(fix_flow)

    def add_transform(self, layer, what=None):
        if what is None:
            self.layers.append(layer)
        else:
            return NotImplemented

    def add_split(self, what, into, sizes_or_indices, dim=-1):
        into = list(into)
        for i, el in enumerate(into):
            if isinstance(el, str):
                into[i] = TensorInfo(name=el, is_circular=what.is_circular)
        input_index = self.current_dims.index(what)
        split_flow = bg.SplitFlow(*sizes_or_indices, dim=dim)
        if split_flow._sizes is None:
            sizes = (len(size) for size in sizes_or_indices)
        else:
            sizes = sizes_or_indices
        self.current_dims.split(what, into, sizes, dim=dim)
        output_indices = [self.current_dims.index(el) for el in into]
        wrap_flow = bg.WrapFlow(split_flow, indices=(input_index,), out_indices=output_indices)
        self.layers.append(wrap_flow)
        return tuple(into)

    def add_merge(self, what, to, dim=-1, output_index=None, sizes_or_indices=None):
        if isinstance(to, str):
            to = TensorInfo(name=to, is_circular=what[0].is_circular)
        if not all(w.is_circular == to.is_circular for w in what):
            raise ValueError(
                "Merging non-circular with circular tensors is dangerous. "
                "Found discrepancies in f{what} and f{to}."
            )
        input_indices = [self.current_dims.index(el) for el in what]
        if sizes_or_indices is None:
            sizes_or_indices = [self.current_dims[el][dim] for el in what]
        merge_flow = bg.MergeFlow(*sizes_or_indices, dim=dim)
        self.current_dims.merge(what, to=to, index=output_index)
        output_index = self.current_dims.index(to)
        wrap_flow = bg.WrapFlow(merge_flow, indices=input_indices, out_indices=(output_index,))
        self.layers.append(wrap_flow)
        return to

    def add_map_to_cartesian(
            self,
            coordinate_transform,
            fixed_origin_and_rotation=True,
            bonds=BONDS,
            angles=ANGLES,
            torsions=TORSIONS,
            fixed=FIXED,
            origin=ORIGIN,
            rotation=ROTATION,
            out=TARGET
    ):
        ic_fields = [bonds, angles, torsions]

        # fix origin and rotation
        if isinstance(coordinate_transform, bg.GlobalInternalCoordinateTransformation):
            ic_fields.extend([origin, rotation])
            if fixed_origin_and_rotation:
                self.add_set_constant(origin, torch.zeros(1, 3, **self.ctx))
                self.add_set_constant(rotation, torch.eye(3, **self.ctx).unsqueeze(0))
        else:
            ic_fields.append(fixed)

        # merge constrained bonds
        if bonds in self._constrained_bonds:
            constrained_bond_indices, unconstrained_bond_indices, constrained_lengths = self._constrained_bonds[bonds]
            constrained_bonds = TensorInfo(f"{bonds.name}_constrained", bonds.is_circular)
            self.add_set_constant(constrained_bonds, constrained_lengths)
            self.add_merge(
                (bonds, constrained_bonds),
                to=bonds,
                sizes_or_indices=(unconstrained_bond_indices, constrained_bond_indices)
            )

        indices = [self.current_dims.index(ic) for ic in ic_fields]
        wrap_around_ics = bg.WrapFlow(
            bg.InverseFlow(coordinate_transform),
            indices=indices,
            out_indices=(self.current_dims.index(bonds),)
        )
        self.current_dims.merge(ic_fields, out)
        self.layers.append(wrap_around_ics)

    def add_map_to_ic_domains(self, cdfs=dict()):
        if len(cdfs) == 0:
            cdfs = InternalCoordinateMarginals(self.current_dims, self.ctx)
        for field in cdfs:
            if field in self.current_dims:
                icdf_flow = bg.InverseFlow(bg.CDFTransform(cdfs[field]))
                self.layers.append(bg.WrapFlow(icdf_flow, (self.current_dims.index(field),)))
            else:
                warnings.warn(f"Field {field} not in current dims. CDF is ignored.")
