# Supplementary material
Source: ML conference proceedings conference paper supplement (https://proceedings.neurips.cc/paper_files/paper/2021/hash/167434fa6219316417cd4160c0c5e7d2-Abstract.html)
Supplement: Supplementary file 1 [file 167434fa6219316417cd4160c0c5e7d2-Supplemental.zip › supplementary-material/code/bgflow/bgflow/factory/transformer_factory.py]

import torch
import bgflow as bg

__all__ = ["make_transformer"]


def make_transformer(transformer_type, what, shape_info, conditioners, inverse=False, **kwargs):
    factory = TRANSFORMER_FACTORIES[transformer_type]
    transformer = factory(what=what, shape_info=shape_info, conditioners=conditioners, **kwargs)
    if inverse:
        transformer = bg.InverseFlow(transformer)
    return transformer


def _make_spline_transformer(what, shape_info, conditioners, **kwargs):
    return bg.ConditionalSplineTransformer(
        is_circular=shape_info.is_circular(what),
        **conditioners,
        **kwargs
    )


def _make_affine_transformer(what, shape_info, conditioners, **kwargs):
    if shape_info.dim_circular(what) > 0:
        raise NotImplementedError("Circular affine transformers are currently not supported.")
    return bg.AffineTransformer(
        **conditioners,
        **kwargs
    )


def _make_sigmoid_transformer(
        what,
        shape_info,
        conditioners,
        smoothness_type="type1",
        zero_boundary_left=False,
        zero_boundary_right=False,
        **kwargs
):
    assert all(field.is_circular == what[0].is_circular for field in what)
    transformer = bg.MixtureCDFTransformer(
        compute_weights=conditioners["weights"],
        compute_components=bg.AffineSigmoidComponents(
            conditional_ramp=bg.SmoothRamp(
                compute_alpha=conditioners["alphas"],
                unimodal=True,
                ramp_type=smoothness_type
            ),
            compute_params=conditioners["params"],
            periodic=what[0].is_circular,
            min_density=torch.tensor(1e-6),
            log_sigma_bound=torch.tensor(1.),
            zero_boundary_left=zero_boundary_left,
            zero_boundary_right=zero_boundary_right,
            **kwargs
        )
    )
    transformer = bg.WrapCDFTransformerWithInverse(
        transformer=transformer,
        oracle=bg.GridInversion( #bg.BisectionRootFinder(
            transformer=transformer,
            compute_init_grid=lambda x, y: torch.linspace(0, 1, 100).view(-1, 1, 1).repeat(1, *y.shape).to(y)
            #abs_tol=torch.tensor(1e-5), max_iters=max_iters, verbose=False, raise_exception=True
        )
    )
    return transformer


TRANSFORMER_FACTORIES = {
    bg.ConditionalSplineTransformer: _make_spline_transformer,
    bg.AffineTransformer: _make_affine_transformer,
    bg.MixtureCDFTransformer: _make_sigmoid_transformer
}
