# Supplementary material
Source: ML conference proceedings conference paper supplement (https://proceedings.neurips.cc/paper_files/paper/2021/hash/167434fa6219316417cd4160c0c5e7d2-Abstract.html)
Supplement: Supplementary file 1 [file 167434fa6219316417cd4160c0c5e7d2-Supplemental.zip › supplementary-material/code/bgflow/bgflow/nn/flow/__init__.py]

from .base import *
from .crd_transform import *
from .dynamics import *
from .estimator import *
from .stochastic import *
from .transformer import *
from .root_finding import *

from .affine import *
from .coupling import *
from .funnel import FunnelFlow
from .spline import LinearSplineFlow
from .kronecker import KroneckerProductFlow
from .sequential import SequentialFlow
from .inverted import *
from .checkerboard import CheckerboardFlow
from .bnaf import BNARFlow
from .elementwise import *
from .orthogonal import *
from .triangular import *
from .pppp import *
from .diffeq import DiffEqFlow
from .cdf import *
