# Supplementary material
Source: ML conference proceedings conference paper supplement (https://proceedings.neurips.cc/paper_files/paper/2021/hash/167434fa6219316417cd4160c0c5e7d2-Abstract.html)
Supplement: Supplementary file 1 [file 167434fa6219316417cd4160c0c5e7d2-Supplemental.zip › supplementary-material/code/bgflow/bgflow/nn/flow/base.py]

import torch


__all__ = ["Flow"]


class Flow(torch.nn.Module):
    def __init__(self):
        super().__init__()

    def _forward(self, *xs, **kwargs):
        raise NotImplementedError()

    def _inverse(self, *xs, **kwargs):
        raise NotImplementedError()

    def forward(self, *xs, inverse=False, **kwargs):
        if inverse:
            return self._inverse(*xs, **kwargs)
        else:
            return self._forward(*xs, **kwargs)
