# Supplementary material
Source: ML conference proceedings conference paper supplement (https://proceedings.neurips.cc/paper_files/paper/2021/hash/167434fa6219316417cd4160c0c5e7d2-Abstract.html)
Supplement: Supplementary file 1 [file 167434fa6219316417cd4160c0c5e7d2-Supplemental.zip › supplementary-material/code/bgflow/bgflow/nn/flow/dynamics/__init__.py]

from .density import DensityDynamics
from .inversed import InversedDynamics
from .blackbox import BlackBoxDynamics
from .simple import TimeIndependentDynamics
from .kernel_dynamic import KernelDynamics
from .anode_dynamic import AnodeDynamics
