# Supplementary material
Source: ML conference proceedings conference paper supplement (https://proceedings.neurips.cc/paper_files/paper/2021/hash/167434fa6219316417cd4160c0c5e7d2-Abstract.html)
Supplement: Supplementary file 1 [file 167434fa6219316417cd4160c0c5e7d2-Supplemental.zip › supplementary-material/code/bgflow/bgflow/nn/flow/dynamics/anode_dynamic.py]

import torch


class AnodeDynamics(torch.nn.Module):
    """Wrapper class to allow the use of the ANODE ode solver.

    Attributes
    ----------
    dynamics : torch.nn.Module
        A dynamics function that computes the change of the system and its density.
    """

    def __init__(self, dynamics):
        super().__init__()
        self._dynamics = dynamics

    def forward(self, t, state):
        """
        Converts the the concatenated state, which is required for the ANODE ode solver,
        to the tuple (`xs`, `dlogp`) for the following dynamics function.
        Then the output is concatenated again for the ANODE ode solver.

        Parameters
        ----------
        t : PyTorch tensor
            The current time
        state : PyTorch tensor
            The current state of the system

        Returns
        -------
        state : PyTorch tensor
            The combined state update of shape `[n_batch, n_dimensions]`
            containing the state update of the system state `dx/dt`
            (`state[:, :-1]`) and the update of the log density (`state[:, -1]`).
        """
        xs = state[:, :-1]
        dlogp = state[:, -1:]
        state = (xs, dlogp)
        *dxs, div = self._dynamics(t, state)
        state = torch.cat([*dxs, div], dim=-1)
        return state
