# Supplementary material
Source: ML conference proceedings conference paper supplement (https://proceedings.neurips.cc/paper_files/paper/2021/hash/167434fa6219316417cd4160c0c5e7d2-Abstract.html)
Supplement: Supplementary file 1 [file 167434fa6219316417cd4160c0c5e7d2-Supplemental.zip › supplementary-material/code/bgflow/bgflow/nn/flow/dynamics/simple.py]

import torch


class TimeIndependentDynamics(torch.nn.Module):
    """
    Time independent dynamics function.
    """

    def __init__(self, dynamics):
        super().__init__()
        self._dynamics = dynamics

    def forward(self, t, xs):
        """
        Computes the change of the system `dxs` due to a time independent dynamics function.

        Parameters
        ----------
        t : PyTorch tensor
            The current time
        xs : PyTorch tensor
            The current configuration of the system

        Returns
        -------
        dxs : PyTorch tensor
            The change of the system due to the dynamics function
        """

        dxs = self._dynamics(xs)
        return dxs
