# Supplementary material
Source: ML conference proceedings conference paper supplement (https://proceedings.neurips.cc/paper_files/paper/2021/hash/167434fa6219316417cd4160c0c5e7d2-Abstract.html)
Supplement: Supplementary file 1 [file 167434fa6219316417cd4160c0c5e7d2-Supplemental.zip › supplementary-material/code/bgflow/bgflow/nn/flow/estimator/brute_force_estimator.py]

from bgflow.utils.autograd import brute_force_jacobian_trace
import torch


class BruteForceEstimator(torch.nn.Module):
    """
    Exact bruteforce estimation of the divergence of a dynamics function.
    """

    def __init__(self):
        super().__init__()

    def forward(self, dynamics, t, xs):
        """
        Computes the change of the system `dxs` due to a time independent dynamics function.
        Furthermore, also computes the exact change of log density
        which is equal to the divergence of the change `dxs`.

        Parameters
        ----------
        dynamics : torch.nn.Module
            A dynamics function that computes the change of the system and its density.
        t : PyTorch tensor
            The current time
        xs : PyTorch tensor
            The current configuration of the system

        Returns
        -------
        dxs, -divergence: PyTorch tensors
            The combined state update of shape `[n_batch, n_dimensions]`
            containing the state update of the system state `dx/dt`
            (`dxs`) and the negative update of the log density (`-divergence`)
        """

        with torch.set_grad_enabled(True):
            xs.requires_grad_(True)
            dxs = dynamics(t, xs)

            assert len(dxs.shape) == 2, "`dxs` must have shape [n_btach, system_dim]"
            divergence = brute_force_jacobian_trace(dxs, xs)

        return dxs, -divergence.view(-1, 1)
