# Supplementary material
Source: ML conference proceedings conference paper supplement (https://proceedings.neurips.cc/paper_files/paper/2021/hash/167434fa6219316417cd4160c0c5e7d2-Abstract.html)
Supplement: Supplementary file 1 [file 167434fa6219316417cd4160c0c5e7d2-Supplemental.zip › supplementary-material/code/bgflow/bgflow/nn/flow/spline.py]

import torch
import numpy as np


# TODO: write docstrings
# TODO: numerically unstable! check reference implementation!


def _compute_bin_filter(x, grid):
    """
        x: [n_batch, n_dim]
        grid: [n_batch, n_dim, n_grid]
        
        returns
            bin_filter: [n_batch, n_dim, n_grid + 2]
    """

    x = x.unsqueeze(-1)
    #     grid = grid.unsqueeze(0)

    is_in = (x >= grid[..., :-1]) & (x < grid[..., 1:])
    is_left = x < grid[..., [0]]
    is_right = x >= grid[..., [-1]]

    bin_filter = torch.cat([is_left, is_in, is_right], dim=-1).to(x)

    return bin_filter


def _compute_dx(x, grid):
    """
        x: [n_batch, n_dim]
        grid: [n_batch, n_dim, n_grid]
        
        returns
            dx: [n_batch, n_dim, n_grid]
    """

    x = x.unsqueeze(-1)
    #     grid = grid.unsqueeze(0)

    dx = x - grid
    dx = torch.cat([dx[..., [0]], dx], dim=-1)

    return dx


def _compute_slope(cdf, grid, eps=1e-7):
    n_batch = cdf.shape[0]
    n_dim = cdf.shape[1]
    slope = (cdf[..., 1:] - cdf[..., :-1]) / (grid[..., 1:] - grid[..., :-1] + eps)
    slope = torch.cat(
        [torch.ones(n_batch, n_dim, 1), slope, torch.ones(n_batch, n_dim, 1)], dim=-1
    )
    return slope


def _compute_transform(dx, cdf, slope, bin_filter):
    n_batch = cdf.shape[0]
    n_dim = cdf.shape[1]
    cdf = torch.cat([torch.zeros(n_batch, n_dim, 1), cdf], dim=-1)

    y = ((cdf + dx * slope) * bin_filter).sum(dim=-1)
    logdet = (slope * bin_filter).sum(dim=-1).log().sum(dim=-1, keepdim=True)

    return y, logdet


def _compute_cdf(pdf):
    n_batch = pdf.shape[0]
    n_dim = pdf.shape[1]
    cdf = torch.cumsum(pdf, dim=-1)
    cdf = torch.cat([torch.zeros(n_batch, n_dim, 1), cdf], dim=-1)
    return cdf


def _spline(x, unnormed_pdf, grid=None, inverse=False):
    if len(unnormed_pdf.shape) < 3:
        unnormed_pdf = unnormed_pdf.unsqueeze(0)

    n_batch = unnormed_pdf.shape[0]
    n_dim = unnormed_pdf.shape[1]
    n_grid = unnormed_pdf.shape[2]
    
    unnormed_pdf = unnormed_pdf.to(x)
    pdf = torch.softmax(unnormed_pdf, dim=-1)
    cdf = _compute_cdf(pdf)

    if grid is None:
        grid = torch.linspace(0, 1, n_grid + 1).repeat(n_batch, n_dim, 1)
    grid = grid.to(x)

    if inverse:
        cdf, grid = grid, cdf

    bin_filter = _compute_bin_filter(x, grid)
    dx = _compute_dx(x, grid)
    slope = _compute_slope(cdf, grid)

    y, logdet = _compute_transform(dx, cdf, slope, bin_filter)

    return y, logdet


class LinearSplineFlow(torch.nn.Module):
    def __init__(self, n_points, n_dims, min_val=-1.0, max_val=1.0):
        super().__init__()
        self._n_points = n_points
        self._n_dims = n_dims

        self._pdf = torch.nn.Parameter(torch.Tensor(1, n_dims, self._n_points).zero_())

        self._min_val = min_val
        self._max_val = max_val

    def forward(self, x, inverse=False):
        n_dim = x.shape[-1]
        x = (x - self._min_val) / (self._max_val - self._min_val)
        y, logdet = _spline(x, self._pdf, grid=None, inverse=inverse)
        y = y * (self._max_val - self._min_val) + self._min_val
        return y, logdet
