# Supplementary material
Source: ML conference proceedings conference paper supplement (https://proceedings.neurips.cc/paper_files/paper/2021/hash/167434fa6219316417cd4160c0c5e7d2-Abstract.html)
Supplement: Supplementary file 1 [file 167434fa6219316417cd4160c0c5e7d2-Supplemental.zip › supplementary-material/code/bgflow/bgflow/nn/flow/transformer/base.py]

from ..base import Flow


__all__ = ["Transformer"]


class Transformer(Flow):
    
    def __init__(self):
        super().__init__()
    
    def _forward(self, x, y, *args, **kwargs):
        raise NotImplementedError()
    
    def _inverse(self, x, y, *args, **kwargs):
        raise NotImplementedError()
