# Supplementary material
Source: ML conference proceedings conference paper supplement (https://proceedings.neurips.cc/paper_files/paper/2021/hash/167434fa6219316417cd4160c0c5e7d2-Abstract.html)
Supplement: Supplementary file 1 [file 167434fa6219316417cd4160c0c5e7d2-Supplemental.zip › supplementary-material/code/bgflow/bgflow/utils/__init__.py]

from .train import IndexBatchIterator 
from .shape import tile
from .types import (
    is_list_or_tuple,
    assert_numpy
)
from .autograd import (
    brute_force_jacobian, 
    brute_force_jacobian_trace 
)
from .geometry import (
    distance_vectors,
    distances_from_vectors
)
from .rbf_kernels import (
    kernelize_with_rbf,
    compute_gammas,
    RbfEncoder,
    rbf_kernels
)
