# Supplementary material
Source: ML conference proceedings conference paper supplement (https://proceedings.neurips.cc/paper_files/paper/2021/hash/167434fa6219316417cd4160c0c5e7d2-Abstract.html)
Supplement: Supplementary file 1 [file 167434fa6219316417cd4160c0c5e7d2-Supplemental.zip › supplementary-material/code/bgflow/bgflow/utils/plot/ala2.py]

import matplotlib as mpl
import matplotlib.pyplot as plt
import numpy as np


def plot_2ala_ramachandran(traj, ax=None, weights=None):
    import mdtraj as md

    if ax == None:
        ax = plt.gca()

    if isinstance(weights, np.ndarray):
        ax.hist2d(
            md.compute_phi(traj)[1].reshape(-1),
            md.compute_psi(traj)[1].reshape(-1),
            bins=[np.linspace(-np.pi, np.pi, 64), np.linspace(-np.pi, np.pi, 64)],
            norm=mpl.colors.LogNorm(),
            weights=weights,
        )
    else:
        ax.hist2d(
            md.compute_phi(traj)[1].reshape(-1),
            md.compute_psi(traj)[1].reshape(-1),
            bins=[np.linspace(-np.pi, np.pi, 64), np.linspace(-np.pi, np.pi, 64)],
            norm=mpl.colors.LogNorm(),
        )

    ax.set_xlim(-np.pi, np.pi)
    ax.set_ylim(-np.pi, np.pi)
    ax.set_xlabel(r"$\phi$")
    ax.set_ylabel(r"$\psi$")
