# Supplementary material
Source: ML conference proceedings conference paper supplement (https://proceedings.neurips.cc/paper_files/paper/2021/hash/167434fa6219316417cd4160c0c5e7d2-Abstract.html)
Supplement: Supplementary file 1 [file 167434fa6219316417cd4160c0c5e7d2-Supplemental.zip › supplementary-material/code/bgflow/bgflow/utils/shape.py]

import torch
import numpy as np


def tile(a, dim, n_tile):
    """
    Tiles a pytorch tensor along one an arbitrary dimension.

    Parameters
    ----------
    a : PyTorch tensor
        the tensor which is to be tiled
    dim : Integer
        dimension along the tensor is tiled
    n_tile : Integer
        number of tiles

    Returns
    -------
    b : PyTorch tensor
        the tensor with dimension `dim` tiled `n_tile` times
    """
    init_dim = a.size(dim)
    repeat_idx = [1] * a.dim()
    repeat_idx[dim] = n_tile
    a = a.repeat(*(repeat_idx))
    order_index = np.concatenate(
        [init_dim * np.arange(n_tile) + i for i in range(init_dim)]
    )
    order_index = torch.LongTensor(order_index).to(a).long()
    return torch.index_select(a, dim, order_index)
