# Supplementary material
Source: ML conference proceedings conference paper supplement (https://proceedings.neurips.cc/paper_files/paper/2021/hash/167434fa6219316417cd4160c0c5e7d2-Abstract.html)
Supplement: Supplementary file 1 [file 167434fa6219316417cd4160c0c5e7d2-Supplemental.zip › supplementary-material/code/bgflow/bgflow/utils/types.py]

import numpy as np
import torch


def is_list_or_tuple(x):
    return isinstance(x, list) or isinstance(x, tuple)
       
def assert_numpy(x, arr_type=None):
    if isinstance(x, torch.Tensor):
        if x.is_cuda:
            x = x.cpu()
        x = x.detach().numpy()
    if is_list_or_tuple(x):
        x = np.array(x)
    assert isinstance(x, np.ndarray)
    if arr_type is not None:
        x = x.astype(arr_type)
    return x
