# Supplementary material
Source: ML conference proceedings conference paper supplement (https://proceedings.neurips.cc/paper_files/paper/2021/hash/167434fa6219316417cd4160c0c5e7d2-Abstract.html)
Supplement: Supplementary file 1 [file 167434fa6219316417cd4160c0c5e7d2-Supplemental.zip › supplementary-material/code/bgmol/bgmol/__init__.py]

"""
ProjectName
Collection of OpenMM systems
"""

# package-wide paths
import os

SYSTEMPATH = os.path.join(os.path.dirname(os.path.normpath(__file__)), "systems")
DATASETSPATH = os.path.join(os.path.dirname(os.path.normpath(__file__)), "datasets")
DATAPATH = os.path.join(os.path.dirname(os.path.normpath(__file__)), "data")


# Add imports here
from . import datasets
from . import systems
