# Supplementary material
Source: ML conference proceedings conference paper supplement (https://proceedings.neurips.cc/paper_files/paper/2021/hash/167434fa6219316417cd4160c0c5e7d2-Abstract.html)
Supplement: Supplementary file 1 [file 167434fa6219316417cd4160c0c5e7d2-Supplemental.zip › supplementary-material/code/bgmol/bgmol/data/A.pdb]

REMARK    GENERATED BY TRJCONV
TITLE     Protein in water
REMARK    THIS IS A SIMULATION BOX
CRYST1   31.874   31.874   31.874  90.00  90.00  90.00 P 1           1
MODEL        1
ATOM      1  CH3 ACE     1      13.750  12.500  15.730  1.00  0.00           C
ATOM      2 1HH3 ACE     1      13.120  12.550  16.620  1.00  0.00           H
ATOM      3 2HH3 ACE     1      13.270  13.060  14.930  1.00  0.00           H
ATOM      4 3HH3 ACE     1      13.770  11.430  15.490  1.00  0.00           H
ATOM      5  C   ACE     1      15.110  13.100  16.180  1.00  0.00           C
ATOM      6  O   ACE     1      16.060  12.360  16.300  1.00  0.00           O
ATOM      7  N   ALA     2      15.230  14.410  16.330  1.00  0.00           N
ATOM      8  H   ALA     2      14.450  15.000  16.070  1.00  0.00           H
ATOM      9  CA  ALA     2      16.450  15.150  16.670  1.00  0.00           C
ATOM     10  HA  ALA     2      17.030  14.590  17.400  1.00  0.00           H
ATOM     11  CB  ALA     2      17.300  15.300  15.400  1.00  0.00           C
ATOM     12  HB1 ALA     2      17.920  16.190  15.540  1.00  0.00           H
ATOM     13  HB2 ALA     2      17.800  14.390  15.080  1.00  0.00           H
ATOM     14  HB3 ALA     2      16.630  15.550  14.570  1.00  0.00           H
ATOM     15  C   ALA     2      16.180  16.460  17.340  1.00  0.00           C
ATOM     16  O   ALA     2      15.090  17.030  17.090  1.00  0.00           O
ATOM     17  N   NME     3      17.150  17.050  18.090  1.00  0.00           N
ATOM     18  H   NME     3      17.980  16.530  18.310  1.00  0.00           H
ATOM     19  CH3 NME     3      17.030  18.470  18.520  1.00  0.00           C
ATOM     20 1HH3 NME     3      18.010  18.710  18.920  1.00  0.00           H
ATOM     21 2HH3 NME     3      16.740  19.110  17.680  1.00  0.00           H
ATOM     22 3HH3 NME     3      16.310  18.580  19.330  1.00  0.00           H
TER
ENDMDL
