# Supplementary material
Source: ML conference proceedings conference paper supplement (https://proceedings.neurips.cc/paper_files/paper/2021/hash/167434fa6219316417cd4160c0c5e7d2-Abstract.html)
Supplement: Supplementary file 1 [file 167434fa6219316417cd4160c0c5e7d2-Supplemental.zip › supplementary-material/code/bgmol/bgmol/data/README.md]

# Data for Alanine Dipeptide System

- Download the MD trajectory from [https://drive.google.com/file/d/1zd3bkWmaTLRUl3W7uO-IplcSMOBDmO2_/view?usp=sharing](here)
- (If needed: concatenate the part files of the archive)
- Unpack here: `tar xzvf AImplicitUnconstrained.tgz`
