# Supplementary material
Source: ML conference proceedings conference paper supplement (https://proceedings.neurips.cc/paper_files/paper/2021/hash/167434fa6219316417cd4160c0c5e7d2-Abstract.html)
Supplement: Supplementary file 1 [file 167434fa6219316417cd4160c0c5e7d2-Supplemental.zip › supplementary-material/code/bgmol/bgmol/datasets/minipeptides.py]

import os
import numpy as np

from simtk import unit
from simtk.openmm.app import HBonds
from simtk.openmm import LangevinIntegrator, Platform

from .base import DataSet
from ..systems.minipeptides import MiniPeptide
from ..tpl.hdf5 import load_hdf5, HDF5TrajectoryFile
from bgmol.util import get_data_file

__all__ = ["AImplicitUnconstrained"]


class AImplicitUnconstrained(DataSet):
    """Capped alanine in implicit solvent without bond constraints.
    1 microsecond samples spaced in 1 ps intervals.
    The dataset contains positions, forces, and energies.
    """
    md5 = "f18b9a9c06f3590f1632ca99161c6553"
    num_frames = 1000000
    size = 461080  # in bytes
    selection = "all"
    openmm_version = "7.5.0"

    def __init__(self, root=get_data_file("../data"), read: bool = False):
        super().__init__(root=root, read=read)
        self._system = MiniPeptide(
            "A",
            solvated=False,
            constraints=None,
        )
        self._temperature = 300.

    @property
    def trajectory_file(self):
        return os.path.join(self.root, "AImplicitUnconstrained/traj0.h5")

    def read(self, n_frames=None, stride=None, atom_indices=None):
        self.trajectory = load_hdf5(self.trajectory_file)
        f = HDF5TrajectoryFile(self.trajectory_file)
        frames = f.read(n_frames=n_frames, stride=stride, atom_indices=atom_indices)
        self._energies = frames.potentialEnergy
        self._forces = frames.forces
        f.close()

    @property
    def integrator(self):
        integrator = LangevinIntegrator(self.temperature * unit.kelvin, 1.0 / unit.picosecond, 1.0 * unit.femtosecond)
        return integrator

    @property
    def platform(self):
        platform = Platform.getPlatformByName("CUDA")
        platform.setPropertyDefaultValue("Precision", "mixed")
        return platform
