# Supplementary material
Source: ML conference proceedings conference paper supplement (https://proceedings.neurips.cc/paper_files/paper/2021/hash/167434fa6219316417cd4160c0c5e7d2-Abstract.html)
Supplement: Supplementary file 1 [file 167434fa6219316417cd4160c0c5e7d2-Supplemental.zip › supplementary-material/code/bgmol/bgmol/systems/minipeptides.py]

import os
import tempfile
from collections import OrderedDict
from simtk.openmm import app
from simtk import unit
from bgmol.systems import OpenMMSystem
from bgmol.util import get_data_file

__all__ = ["MiniPeptide", "AMINO_ACIDS"]


class MiniPeptide(OpenMMSystem):

    def __init__(
            self,
            aminoacids="AA",
            forcefield=["amber99sbildn.xml", "tip3p.xml", "amber99_obc.xml"],
            constraints=app.HBonds,
            solvated=False,
            hydrogen_mass=None,
            nonbonded_cutoff=0.9*unit.nanometer,
            switch_distance=None,
            root=get_data_file("../data/"),
    ):
        super(MiniPeptide, self).__init__()

        # register parameters
        self.aminoacid = self.system_parameter(
            "aminoacids", aminoacids, default="AA"
        )
        self.forcefield = self.system_parameter(
            "forcefield", forcefield, default=["amber99sbildn.xml", "tip3p.xml", "amber99_obc.xml"]
        )
        self.constraints = self.system_parameter(
            "constraints", constraints, default=app.HBonds
        )
        self.solvated = self.system_parameter(
            "solvated", solvated, default=True
        )
        self.hydrogen_mass = self.system_parameter(
            "hydrogen_mass", hydrogen_mass, default=None
        )
        self.nonbonded_cutoff = self.system_parameter(
            "nonbonded_cutoff", nonbonded_cutoff, default=0.9*unit.nanometer
        )
        self.switch_distance = self.system_parameter(
            "switch_distance", switch_distance, default=None
        )

        # create system
        if solvated:
            nonbonded_method = app.PME
            filename = f"{aminoacids}_solvated.pdb"
            forcefield = [fname for fname in forcefield if fname != "amber99_obc.xml"]
        else:
            nonbonded_method = app.NoCutoff
            filename = f"{aminoacids}.pdb"
            forcefield = [fname for fname in forcefield if fname != "tip3p.xml"]

        full_filename = os.path.join(root, filename)

        pdb = app.PDBFile(full_filename)
        ff = app.ForceField(*forcefield)
        self._system = ff.createSystem(
            pdb.topology,
            removeCMMotion=True,
            nonbondedMethod=nonbonded_method,
            nonbondedCutoff=nonbonded_cutoff,
            switchDistance=switch_distance,
            constraints=constraints,
            hydrogenMass=hydrogen_mass,
            rigidWater=True
        )
        self._positions = pdb.positions
        self._topology = pdb.topology


AMINO_ACIDS = OrderedDict([
    ("A", "Alanine"),
    ("C", "Cysteine"),
    ("D", "AsparticAcid"),
    ("E", "GlutamicAcid"),
    ("F", "Phenylalanine"),
    ("G", "Glycine"),
    ("H", "Histidine"),
    ("I", "Isoleucine"),
    ("K", "Lysine"),
    ("L", "Leucine"),
    ("M", "Methionine"),
    ("N", "Asparagine"),
    ("P", "Proline"),
    ("Q", "Glutamine"),
    ("R", "Arginine"),
    ("S", "Serine"),
    ("T", "Threonine"),
    ("V", "Valine"),
    ("W", "Tryptophan"),
    ("Y", "Tyrosine")
])
