# Supplementary material
Source: ML conference proceedings conference paper supplement (https://proceedings.neurips.cc/paper_files/paper/2021/hash/167434fa6219316417cd4160c0c5e7d2-Abstract.html)
Supplement: Supplementary file 1 [file 167434fa6219316417cd4160c0c5e7d2-Supplemental.zip › supplementary-material/code/bgmol/setup.py]

"""
ProjectName
Collection of OpenMM systems
"""
import sys
from setuptools import setup, find_packages

setup(
    # Self-descriptive entries which should always be present
    name='bgmol',
    packages=find_packages(),
    include_package_data=True,
    package_data={'bgmol': ['bgmol/data/']}
)
