# Supplementary material
Source: ML conference proceedings conference paper supplement (https://proceedings.neurips.cc/paper_files/paper/2021/hash/167434fa6219316417cd4160c0c5e7d2-Abstract.html)
Supplement: Supplementary file 1 [file 167434fa6219316417cd4160c0c5e7d2-Supplemental.zip › supplementary-material/code/experiment_ala2/plot_md_energies.ipynb]

# %% [code]
import numpy as np
from matplotlib import pyplot as plt

# %% [code]
spline = np.load("energies_spline.npy")
amber = np.load("energies_amber.npy")
smooth = np.load("energies_smooth.npy")
dt = 0.01

# %% [code]
fig, axes = plt.subplots(1,3, figsize=(7,2.5), sharey=True)
fig.tight_layout()

labels = ["Amber Force Field", "Smooth", "Spline"]
for ax, energies, label in zip(axes, [amber, smooth, spline], labels):
    times = np.arange(len(energies))*dt
    shift = energies[0,2,:] - amber[0,2,:]
    ax.plot(times, energies[:,2,:] - energies[:,2,:].mean(axis=0), lw=0.5, color=(0.2,0.2,0.2,0.4))
    ax.plot(times, energies[:,2,3] - energies[:,2,3].mean(axis=0), lw=0.7, color="black")            
    ax.set_xlim(0.0, 10.)
    ax.set_ylim(-5.0, 5.0)
    ax.set_xlabel("t [ps]")
    ax.set_title(label)

axes[0].set_ylabel("Total Energy [kJ/mol]")


ax = axes[2]
fig.savefig("energy_conservation.png", dpi=360, bbox_inches="tight")

# %% [code]
fig, axes = plt.subplots(1,4, figsize=(8,1.5))
#fig.tight_layout()

labels = ["Amber Force Field", "Smooth Flow", "Spline Flow", "Spline (Rescaled)"]
for ax, energies, label, letter in zip(axes, [amber, smooth, spline, spline], labels, "abcd"):
    times = np.arange(len(energies))*dt
    shift = energies[0,2,:] - amber[0,2,:]
    if label == "Spline (Rescaled)":
        ax, ax2 = ax.twinx(), ax
        ax2.get_yaxis().set_visible(False)
    colbg = (0.2,0.2,0.2,0.7) if "Spline" in label else (0.2,0.2,0.2,0.3)
    ax.plot(times, energies[:,2,:] - energies[0,2,:], lw=0.5, color=colbg)
    ax.plot(times, energies[:,2,6] - energies[0,2,6], lw=0.7, color="black")            
    ax.set_xlim(0.0, 5.)
    if label != "Spline (Rescaled)":
        ax.set_ylim(-5.0, 5.0)
        if label in ["Smooth Flow", "Spline Flow"]:
            ax.set_yticklabels([""  for _ in ax.get_yticks()])
    else:
        ax.set_ylim(-3e8, 3e8)
        ax.set_yticks(np.arange(-3e8,4e8,1e8))
        tl = [f"{i:>-2d}x$10^{8}$" for i in range(-3,4)]
        tl[3] = f"{0:>-2d}"
        ax.set_yticklabels(tl)
    ax.set_xlabel("t [ps]")
    ax.set_title(label)
    ax.set_xticks([0,1,2,3,4,5])
    ax.text(0.9, 0.1,f"{letter})",
         horizontalalignment='center',
         verticalalignment='center',
         transform = ax.transAxes,
         fontsize=12
    )

axes[0].set_ylabel("Total Energy [kJ/mol]")
axes[3].set_xlabel("t [ps]")


ax = axes[2]
fig.savefig("md_energies.png", dpi=360, bbox_inches="tight")

# %% [code]
amber[:,2,:].std(axis=0).mean()/60

# %% [code]
smooth[:,2,:].std(axis=0).mean()/60

# %% [code]
