# Supplementary material
Source: ML conference proceedings conference paper supplement (https://proceedings.neurips.cc/paper_files/paper/2021/hash/167434fa6219316417cd4160c0c5e7d2-Abstract.html)
Supplement: Supplementary file 1 [file 167434fa6219316417cd4160c0c5e7d2-Supplemental.zip › supplementary-material/code/experiment_ala2/simulate.ipynb]

# %% [markdown]
# Check Energy Conservation when Simulating with Flows

# %% [code]
%load_ext autoreload
%autoreload 2

# %% [code]
import torch

# %% [markdown]
## Read Model

# %% [code]
CHECKPOINT = "example_checkpoint.ckpt"

# %% [code]

from bgforces.ala2 import Ala2Generator

loaded = Ala2Generator.load_from_checkpoint(
    CHECKPOINT
)

# %% [markdown]
## Read Dataset

# %% [code]
from bgforces.ala2 import Ala2Data
data = Ala2Data(batch_size=128, slice=1)
data.prepare_data()
data.setup()

# %% [markdown]
### Extract Masses and Initial Positions

# %% [code]
from simtk.unit import amu
masses = []

for atom in data.dataset.system.topology.atoms():
    masses.append(atom.element.mass.value_in_unit(amu))

masses = torch.tensor(masses)

# %% [code]
x0=torch.tensor(data.dataset.xyz[:10])
x0.shape, masses.shape
# flow_potential.force(x0)

# %% [markdown]
## Define Model as the Potential for the Simulation

# %% [code]
from bgforces.util import FlowPotentialWrapper
potential = FlowPotentialWrapper(loaded.model, data.dataset.temperature)

# %% [code]
# -- untoggle this to simulate with the ground truth potential instead --
#potential = FlowPotentialWrapper(
#    data.dataset.system.energy_model, 
#    data.dataset.temperature
#)


# %% [markdown]
## NVT Equilibration

# %% [code]
from bgforces.util import VerletIntegrator, Simulation, LangevinIntegrator
npt_integrator = LangevinIntegrator(potential, 0.001, masses=masses, temperature=300.)
npt_simulation = Simulation(potential, npt_integrator, x0=torch.tensor(data.dataset.xyz[:10]), temperature=data.dataset.temperature)

# %% [code]
npt_simulation.step(1000)

# %% [markdown]
## NVE Simulation

# %% [code]
nve_integrator = VerletIntegrator(potential, 0.001, masses=masses)
nve_simulation = Simulation(
    potential, 
    nve_integrator,
    x0=npt_simulation.x,
    v0=npt_simulation.v
)

# %% [code]
nve_simulation.step(5000)

# %% [code]
nve_simulation.integrator.time_step

# %% [code]
from matplotlib import pyplot as plt
import numpy as np

# %% [code]
fig, ax = plt.subplots(figsize=(3,3))

energies = np.array(nve_simulation.energies)
dt = nve_simulation.report_interval * nve_simulation.integrator.time_step
times = np.arange(len(energies))*dt
ax.plot(times, energies[:,2,:])
ax.set_xlim(0.0, times[-1])
ax.set_xlabel("t [ps]")
ax.set_ylabel("Total Energy [kJ/mol]")

# %% [code]
