# Supplementary material
Source: ML conference proceedings conference paper supplement (https://proceedings.neurips.cc/paper_files/paper/2021/hash/167434fa6219316417cd4160c0c5e7d2-Abstract.html)
Supplement: Supplementary file 1 [file 167434fa6219316417cd4160c0c5e7d2-Supplemental.zip › supplementary-material/code/experiment_toy2d/potential2d-periodic.ipynb]

# %% [code]
import numpy as np

def gauss(_r, r0, sigma):
    return np.exp(-(_r-r0)**2/(2*sigma**2))

# %% [code]
def potential(x,y):
    x = 2*np.pi*x  - np.pi
    y = 2*np.pi*y - np.pi
    cx = 0.0
    cy = 0.0
    dx = np.cos((x - cx)**2 / 2) + 1
    dy = np.cos((y-cy)**2 / 2) + 1
    r = np.sqrt(dx + dy)
    sigma = 0.05
    p = gauss(r, 1.0, sigma) + 0.8 * gauss(r, 2.0, sigma) + 0.6 * gauss(r, 1.5, sigma) + 0.4 * gauss(r, 2.5, sigma)
    
    return -np.log(p)

# %% [code]
from matplotlib import pyplot as plt
from matplotlib.colors import LogNorm

# %% [code]
import numpy as np
X, Y = np.meshgrid(np.linspace(0,1, 100), np.linspace(0,1, 100))

# %% [code]
cs = plt.contour(X,Y,potential(X,Y))#, levels=[0,1,3,5,30])#, norm = LogNorm())
plt.clabel(cs)
plt.xlim(0,1)
plt.ylim(0,1)

# %% [markdown]
## Sample

# %% [code]
x0 = np.column_stack([X.flatten(),Y.flatten()])

# %% [code]
x0.shape

# %% [code]
def enforce_boundaries(x):
    x[x[...,0]>1,0] = 2-x[x[...,0]>1,0]
    x[x[...,0]<0,0] = -x[x[...,0]<0,0]
    x[x[...,1]>1,1] = x[x[...,1]>1,1] - 1 
    x[x[...,1]<0,1] = 1+x[x[...,1]<0,1]
    return x

# %% [code]
def mcmc(x=x0, f=potential, sigma=0.1):
    u = potential(x[...,0],x[...,1])
    # proposal
    std = sigma*np.random.randn(*x.shape)
    x_ = enforce_boundaries(x + std)
    u_ = potential(x_[...,0], x_[...,1])
    # acceptance
    alpha = np.exp(-(u_-u))
    acc = (np.random.rand(x.shape[0]) <= alpha) | (u_ < u)
    x = np.where(acc[...,None], x_, x)
    return x

# %% [code]
x = mcmc(x0.copy())

# %% [code]
# equilibrate
for i in range(1000):
    x = mcmc(x)

# %% [code]
plt.figure(figsize=(4, 4))
plt.hist2d(x[...,0], x[...,1], norm=LogNorm(), bins=100);

# %% [code]
# production
data = []
for i in range(10):
    x = mcmc(x)
    data.append(x.copy())

# %% [code]
data = np.concatenate(data)
data.shape

# %% [code]
np.save("2dsamples-periodic.npy", data)

# %% [code]
